# Supplementary material for: Functional characterization of the GhNRT2.1e gene reveals its significant role in improving nitrogen use efficiency in Gossypium hirsutum
Source: PeerJ. 2023 Mar 28;11:e15152. doi: 10.7717/peerj.15152 (PMC10064996; doi:10.7717/peerj.15152)
Supplement: Supplemental Information 1 [file peerj-11-15152-s001.xlsx]

## Sheet: Sheet1
Table S1 The primers used in this study
Number	Name	Sequence(5'-3')
1	qRT-GhNRT2.1a-F	ATCCTCTTCTCCATCGGAGCCC
2	qRT-GhNRT2.1a-R	TTAGGCCGGAGATGATCCCCAA
3	qRT-GhNRT2.1b-F	GACGTAGCGAGATCAACCGAGG
4	qRT-GhNRT2.1b-R	ATTCTCGGCGAACTTCAGGCTC
5	qRT-GhNRT2.1c-F	CAAAGCAGCCCAGTTGTTTGGG
6	qRT-GhNRT2.1c-R	ACAGCAACGGGAAGTGTATCGG
7	qRT-GhNRT2.1d-F	GGTAGCATGTTCCTTCCGCCTT
8	qRT-GhNRT2.1d-R	GGTAGCATGTTCCTTCCGCCTT
9	qRT-GhNRT2.1e-F	CAGGGATAATTGCCGCCACCTT
10	qRT-GhNRT2.1e-R	GGGCTGCTTTGTCTGAAGCGTA
11	qRT-GhNRT2.3b-F	GGCATGGCCAACTTCTTTGCTC
12	qRT-GhNRT2.3b-R	GCTAAGATGGCGATGGGGAGTG
13	qRT-GhNRT2.4b-F	ATGATCCTCTTCTCCATCGGCG
14	qRT-GhNRT2.4b-R	GAAATTCCCACCGGCTCCAGTT
15	qRT-GhNRT2.5a-F	AGTGGTTCCCTTCGTTTCCC
16	qRT-GhNRT2.5a-R	ACCACAAAACATCCCACCCC
17	qRT-GhNRT2.5b-F	TGCAGACCTTGGGAGGGGTATT
18	qRT-GhNRT2.5b-R	TTCGGGAAACGAAGGGAACCAC
19	qRT-GhNRT2.7a-F	TGTTCAAGCTGCTTCTGGCCTT
20	qRT-GhNRT2.7a-R	TACAACAGCTCCCACTGTCCCT
21	qRT-GhNRT2.7b-F	CACCGCATGGCGAGTCATTTTC
22	qRT-GhNRT2.7b-R	ATGGAGTCCTTGCATGGCAGTT
23	GhActin-PF	ATCCTCCGTCTTGACCTTG
24	GhActin-PR	TGTCCGTCAGGCAACTCAT
25	GhHis3-PF	CGGTGGTGTGAAGAAGCCTCAT
26	GhHis3-PR	AATTTCACGAACAAGCCTCTGGAA
27	AtActin2-PF	TTGTGCTGGATTCTGGTGATGG
28	AtActin2-PR	CCGCTCTGCTGTTGTGGTG
29	35S:PRI101-F	GACGCACAATCCCACTATCC
30	35S:PRI101-R	CAGGAAACAGCTATGAC
31	PRI101-GhNRT2.1e-F(Sal1)	TTGATACATATGCCCGTCGACATGAGTGACATTGAGGGATC
32	PRI101-GhNRT2.1e-R(EcoRI)	GTCGTGGTCCTTATAGTCGGATCCAACATGGGAAGGGGTTGTAT
33	VIGS-GhNRT2.1e-F(EcoRI)	GTGAGTAAGGTTACCGAATTCAGTGGCTTGCACTCTTCCAGTG
34	VIGS-GhNRT2.1e-R(BamHI)	CGTGAGCTCGGTACCGGATCCGGCGAACTTGAGACTAGCCGAG
35	pPR3-N-GhNRT2.1e-F(BamHI)	GTTCCAGATTACGCTGGATCCATGAGTGACATTGAGGGATCC
36	pPR3-N-GhNRT2.1e-R(EcoRI)	GATAAGCTTGATATCGAATTCAACATGGGAAGGGGTTGTATT
37	pBT3-C-GhNAR2.1-F(XbaI)	AAATACACACACTAATCTAGAATGGCAGCTCGAGTTCTTGTT
38	pBT3-C-GhNAR2.1-R(NcoI)	TTCCTGCAGATATACCCATGGCTGCTGAGATTTCCTTGCCTT
39	nLUC-GhNRT2.1e-F(BamHI)	CGAGCTCGGTACCCGGGATCCATGAGTGACATTGAGGGATCC
40	nLUC-GhNRT2.1e-R(SalI)	GCGTACGAGATCTGGTCGACAACATGGGAAGGGGTTGTATT
41	cLUC-GhNAR2.1-F (BamHI)	CCGGGGCGGTACCCGGGATCCATGGCAGCTCGAGTTCTTGTT
42	cLUC-GhNAR2.1-R(SalI)	ACGAAAGCTCTGCAGGTCGACCTGCTGAGATTTCCTTGCCTT
