# Supplementary material for: Functional characterization of the GhNRT2.1e gene reveals its significant role in improving nitrogen use efficiency in Gossypium hirsutum
Source: PeerJ. 2023 Mar 28;11:e15152. doi: 10.7717/peerj.15152 (PMC10064996; doi:10.7717/peerj.15152)
Supplement: Supplemental Information 2 [file peerj-11-15152-s002.xlsx]

## Sheet: Sheet1
Table S2 The information of NRT2 genes in cotton
Gene ID	Principle Transcript ID	Gene Name	Rename	Chromosome	Start	End	Strand	Length (bp)	Transcript Length (bp)	CDS Length (bp)	CDS GC Content (%)	Exon Number	Intron Number	Protein Length(aa)	Molecular Weight (kDa)	Isoelectric Point	Subcellular localization	Transmembrane helices
GH_A03G0413	GH_A03G0413.1	NRT2.1	GhNRT2.1a	A03	5453429	5456730	-	3302	1593	1593	0.532	3	2	530	57.38	9.29	Plasma membrane	11
GH_D03G1561	GH_D03G1561.1	NRT2.1	GhNRT2.1b	D03	48776361	48779514	+	3154	1593	1593	0.536	3	2	530	57.46	9.51	Plasma membrane	11
GH_A05G1070	GH_A05G1070.1	NRT2.1	GhNRT2.1c	A05	9548229	9549998	+	1770	1599	1599	0.483	3	2	532	57.53	8.67	Plasma membrane	11
GH_D05G1061	GH_D05G1061.1	NRT2.1	GhNRT2.1d	D05	8730257	8732030	+	1774	1593	1593	0.482	3	2	530	57.25	8.93	Plasma membrane	11
GH_A08G2271	GH_A08G2271.1	NRT2.1	GhNRT2.1e	A08	119094982	119096769	+	1788	1593	1593	0.473	3	2	530	57.45	9.42	Plasma membrane	11
GH_D08G2278	GH_D08G2278.1	NRT2.1	GhNRT2.1f	D08	63408404	63409615	+	1212	1026	1026	0.45	3	2	341	37.17	8.95	Plasma membrane	7
GH_A03G0412	GH_A03G0412.1	NRT2.3	GhNRT2.3a	A03	5436573	5438269	-	1697	1611	1611	0.492	2	1	536	58.02	9.31	Plasma membrane	10
GH_D03G1562	GH_D03G1562.1	NRT2.3	GhNRT2.3b	D03	48792163	48793859	+	1697	1611	1611	0.498	2	1	536	57.94	9.33	Plasma membrane	11
GH_A09G1652	GH_A09G1652.1	NRT2.4	GhNRT2.4a	A09	73452367	73454136	-	1770	1629	1629	0.468	3	2	542	58.63	8.41	Plasma membrane	10
GH_D09G1598	GH_D09G1598.1	NRT2.4	GhNRT2.4b	D09	43113345	43115113	-	1769	1629	1629	0.466	3	2	542	58.76	8.47	Plasma membrane	10
GH_A12G1637	GH_A12G1637.1	NRT2.5	GhNRT2.5a	A12	89185594	89187196	-	1603	1521	1521	0.475	2	1	506	54.63	9.17	Plasma membrane	10
GH_D12G1645	GH_D12G1645.1	NRT2.5	GhNRT2.5b	D12	46514798	46516400	-	1603	1521	1521	0.472	2	1	506	54.65	9.17	Plasma membrane	10
GH_A07G2514	GH_A07G2514.1	NRT2.7	GhNRT2.7a	A07	95221056	95222887	+	1832	1368	1368	0.473	2	1	455	48.96	8.04	Vacuole	12
GH_D07G2457	GH_D07G2457.1	NRT2.7	GhNRT2.7b	D07	56917012	56918860	+	1849	1368	1368	0.479	2	1	455	48.97	8.34	Vacuole	12
GB_A03G0398	GB_A03G0398.1	NRT2.1	GbNRT2.1a	A03	5203436	5206175	-	2740	1023	1023	0.514	3	2	340	36.911	8.556	Plasma membrane	7
GB_D03G1591	GB_D03G1591.1	NRT2.1	GbNRT2.1b	D03	48680312	48683626	+	3315	1593	1593	0.536	3	2	530	57.456	9.512	Plasma membrane	11
GB_A05G1080	GB_A05G1080.1	NRT2.1	GbNRT2.1c	A05	9921726	9923495	+	1770	1599	1599	0.483	3	2	532	57.526	8.666	Plasma membrane	11
GB_D05G1059	GB_D05G1059.1	NRT2.1	GbNRT2.1d	D05	8922272	8924052	+	1781	1593	1593	0.482	3	2	530	57.267	8.931	Plasma membrane	11
GB_A08G2381	GB_A08G2381.1	NRT2.1	GbNRT2.1e	A08	114637432	114639216	+	1785	1593	1593	0.473	3	2	530	57.448	9.421	Plasma membrane	11
GB_D08G2370	GB_D08G2370.1	NRT2.1	GbNRT2.1f	D08	62016986	62018764	+	1779	1593	1593	0.474	3	2	530	57.504	9.421	Plasma membrane	11
GB_A03G0397	GB_A03G0397.1	NRT2.3	GbNRT2.3a	A03	5181450	5183146	-	1697	1611	1611	0.491	2	1	536	58.004	9.33	Plasma membrane	10
GB_D03G1592	GB_D03G1592.1	NRT2.3	GbNRT2.3b	D03	48697526	48699222	+	1697	1611	1611	0.498	2	1	536	57.938	9.33	Plasma membrane	11
GB_A09G1777	GB_A09G1777.1	NRT2.4	GbNRT2.4a	A09	69525277	69527046	-	1770	1629	1629	0.466	3	2	542	58.616	8.414	Plasma membrane	10
GB_D09G1615	GB_D09G1615.1	NRT2.4	GbNRT2.4b	D09	44675705	44677473	-	1769	1629	1629	0.468	3	2	542	58.741	8.469	Plasma membrane	10
GB_A12G1712	GB_A12G1712.1	NRT2.5	GbNRT2.5a	A12	82623114	82624716	-	1603	1521	1521	0.475	2	1	506	54.632	9.174	Plasma membrane	10
GB_D12G1704	GB_D12G1704.1	NRT2.5	GbNRT2.5b	D12	45520485	45522087	-	1603	1521	1521	0.472	2	1	506	54.646	9.174	Plasma membrane	10
GB_A07G2596	GB_A07G2596.1	NRT2.7	GbNRT2.7a	A07	93631723	93633554	+	1832	1368	1368	0.473	2	1	455	48.921	8.035	Vacuole	12
GB_D07G2577	GB_D07G2577.1	NRT2.7	GbNRT2.7b	D07	55542794	55544642	+	1849	1368	1368	0.479	2	1	455	48.989	8.342	Vacuole	12
Ga01G2432	Ga01G2432.1	NRT2.1	GaNRT2.1a	Chr01	107664264	107667568	-	3305	1593	1593	0.533	3	2	530	57.406	9.287	Plasma membrane	11
Ga05G1127	Ga05G1127.1	NRT2.1	GaNRT2.1b	Chr05	9829746	9831515	+	1770	1599	1599	0.483	3	2	532	57.526	8.666	Plasma membrane	11
Ga08G2340	Ga08G2340.1	NRT2.1	GaNRT2.1c	Chr08	122815496	122817282	+	1787	1593	1593	0.472	3	2	530	57.448	9.421	Plasma membrane	11
Ga01G2431	Ga01G2431.1	NRT2.3	GaNRT2.3	Chr01	107636966	107638661	-	1696	1611	1611	0.493	2	1	536	58.004	9.33	Plasma membrane	10
Ga09G1689	Ga09G1689.1	NRT2.4	GaNRT2.4	Chr09	74729442	74731211	-	1770	1629	1629	0.466	3	2	542	58.644	8.414	Plasma membrane	10
Ga12G1418	Ga12G1418.1	NRT2.5	GaNRT2.5	Chr12	20074616	20076218	+	1603	1521	1521	0.476	2	1	506	54.632	9.174	Plasma membrane	10
Ga07G2578	Ga07G2578.1	NRT2.7	GaNRT2.7	Chr07	95986363	95993011	+	6649	1362	1362	0.475	3	2	453	48.711	8.035	Vacuole	12
Gorai.003G144100	Gorai.003G144100.1	NRT2.1	GrNRT2.1a	Chr03	41014422	41017920	+	3499	1773	1593	0.536	3	2	530	57.456	9.512	Plasma membrane	11
Gorai.004G230700	Gorai.004G230700.1	NRT2.1	GrNRT2.1b	Chr04	56705803	56707835	+	2033	1829	1593	0.472	3	2	530	57.504	9.421	Plasma membrane	11
Gorai.009G110300	Gorai.009G110300.1	NRT2.1	GrNRT2.1c	Chr09	8057769	8059962	+	2194	2014	1593	0.481	3	2	530	57.267	8.931	Plasma membrane	11
Gorai.003G144200	Gorai.003G144200.1	NRT2.3	GrNRT2.3	Chr03	41034665	41036361	+	1697	1611	1611	0.496	2	1	536	57.938	9.33	Plasma membrane	11
Gorai.006G165000	Gorai.006G165000.1	NRT2.4	GrNRT2.4	Chr06	42489027	42490795	-	1769	1629	1629	0.468	3	2	542	58.769	8.47	Plasma membrane	10
Gorai.008G160300	Gorai.008G160300.1	NRT2.5	GrNRT2.5	Chr08	42586479	42588598	-	2120	2038	1521	0.473	2	1	506	54.646	9.174	Plasma membrane	10
Gorai.001G264100	Gorai.001G264100.1	NRT2.7	GrNRT2.7	Chr01	54043969	54046290	+	2322	1842	1368	0.478	2	1	455	48.985	8.344	Vacuole	12
