# Supplementary material for: Functional characterization of the GhNRT2.1e gene reveals its significant role in improving nitrogen use efficiency in Gossypium hirsutum
Source: PeerJ. 2023 Mar 28;11:e15152. doi: 10.7717/peerj.15152 (PMC10064996; doi:10.7717/peerj.15152)
Supplement: Supplemental Information 3 [file peerj-11-15152-s003.xlsx]

## Sheet: Sheet1
Table S3 Duplication information of the GhNRT2 genes
gene name	gene name	Duplication Type
GhNRT2.1a	GhNRT2.3a	tandem
GhNRT2.1b	GhNRT2.3b	tandem
GhNRT2.3a	GhNRT2.1d	Segmental
GhNRT2.3a	GhNRT2.1e	Segmental
GhNRT2.3a	GhNRT2.4a	Segmental
GhNRT2.3a	GhNRT2.1b	Segmental
GhNRT2.3a	GhNRT2.1f	Segmental
GhNRT2.3a	GhNRT2.4b	Segmental
GhNRT2.1d	GhNRT2.1e	Segmental
GhNRT2.7a	GhNRT2.7b	Segmental
GhNRT2.1e	GhNRT2.4a	Segmental
GhNRT2.1e	GhNRT2.1b	Segmental
GhNRT2.1e	GhNRT2.1f	Segmental
GhNRT2.1e	GhNRT2.4b	Segmental
GhNRT2.4a	GhNRT2.1b	Segmental
GhNRT2.4a	GhNRT2.1d	Segmental
GhNRT2.4a	GhNRT2.1f	Segmental
GhNRT2.4a	GhNRT2.4b	Segmental
GhNRT2.5a	GhNRT2.5b	Segmental
GhNRT2.1b	GhNRT2.1d	Segmental
GhNRT2.1b	GhNRT2.1f	Segmental
GhNRT2.1b	GhNRT2.4b	Segmental
GhNRT2.1d	GhNRT2.1f	Segmental
GhNRT2.1d	GhNRT2.4b	Segmental
GhNRT2.3a	GaNRT2.3	WGD
GhNRT2.3a	GaNRT2.1b	WGD
GhNRT2.3a	GaNRT2.1c	WGD
GhNRT2.3a	GaNRT2.4	WGD
GhNRT2.1d	GaNRT2.3	WGD
GhNRT2.1d	GaNRT2.1b	WGD
GhNRT2.1d	GaNRT2.1c	WGD
GhNRT2.1d	GaNRT2.4	WGD
GhNRT2.7a	GaNRT2.7	WGD
GhNRT2.1e	GaNRT2.1b	WGD
GhNRT2.1e	GaNRT2.1c	WGD
GhNRT2.1e	GaNRT2.4	WGD
GhNRT2.4a	GaNRT2.1c	WGD
GhNRT2.4a	GaNRT2.4	WGD
GhNRT2.5a	GaNRT2.7	WGD
GhNRT2.5a	GaNRT2.5	WGD
GaNRT2.3	GhNRT2.1b	WGD
GaNRT2.1b	GhNRT2.1b	WGD
GaNRT2.1b	GhNRT2.1f	WGD
GaNRT2.7	GhNRT2.7b	WGD
GaNRT2.1c	GhNRT2.1b	WGD
GaNRT2.1c	GhNRT2.1f	WGD
GaNRT2.1c	GhNRT2.4b	WGD
GaNRT2.4	GhNRT2.1b	WGD
GaNRT2.4	GhNRT2.1f	WGD
GaNRT2.4	GhNRT2.4b	WGD
GaNRT2.5	GhNRT2.5b	WGD
GhNRT2.3a	GrNRT2.1a	WGD
GhNRT2.3a	GrNRT2.1b	WGD
GhNRT2.3a	GrNRT2.4	WGD
GhNRT2.3a	GrNRT2.1c	WGD
GhNRT2.7a	GrNRT2.7	WGD
GhNRT2.7a	GrNRT2.5	WGD
GhNRT2.1e	GrNRT2.1a	WGD
GhNRT2.1e	GrNRT2.1b	WGD
GhNRT2.1e	GrNRT2.4	WGD
GhNRT2.1e	GrNRT2.1c	WGD
GhNRT2.4a	GrNRT2.1a	WGD
GhNRT2.4a	GrNRT2.1b	WGD
GhNRT2.4a	GrNRT2.4	WGD
GhNRT2.4a	GrNRT2.1c	WGD
GhNRT2.5a	GrNRT2.7	WGD
GhNRT2.5a	GrNRT2.5	WGD
GrNRT2.7	GhNRT2.7b	WGD
GrNRT2.7	GhNRT2.5b	WGD
GrNRT2.1a	GhNRT2.1b	WGD
GrNRT2.1a	GhNRT2.1d	WGD
GrNRT2.1a	GhNRT2.1f	WGD
GrNRT2.1a	GhNRT2.4b	WGD
GrNRT2.1b	GhNRT2.1b	WGD
GrNRT2.1b	GhNRT2.1d	WGD
GrNRT2.1b	GhNRT2.1f	WGD
GrNRT2.1b	GhNRT2.4b	WGD
GrNRT2.4	GhNRT2.1b	WGD
GrNRT2.4	GhNRT2.1d	WGD
GrNRT2.4	GhNRT2.1f	WGD
GrNRT2.4	GhNRT2.4b	WGD
GrNRT2.5	GhNRT2.7b	WGD
GrNRT2.5	GhNRT2.5b	WGD
GrNRT2.1c	GhNRT2.1b	WGD
GrNRT2.1c	GhNRT2.1d	WGD
GrNRT2.1c	GhNRT2.1f	WGD
GrNRT2.1c	GhNRT2.4b	WGD
GhNRT2.3a	GbNRT2.3a	WGD
GhNRT2.3a	GbNRT2.1c	WGD
GhNRT2.3a	GbNRT2.1e	WGD
GhNRT2.3a	GbNRT2.4a	WGD
GhNRT2.3a	GbNRT2.1b	WGD
GhNRT2.3a	GbNRT2.1d	WGD
GhNRT2.3a	GbNRT2.1f	WGD
GhNRT2.3a	GbNRT2.4b	WGD
GhNRT2.1d	GbNRT2.1e	WGD
GhNRT2.1d	GbNRT2.4a	WGD
GhNRT2.1d	GbNRT2.1d	WGD
GhNRT2.7a	GbNRT2.7a	WGD
GhNRT2.7a	GbNRT2.7b	WGD
GhNRT2.1e	GbNRT2.3a	WGD
GhNRT2.1e	GbNRT2.1c	WGD
GhNRT2.1e	GbNRT2.1e	WGD
GhNRT2.1e	GbNRT2.1b	WGD
GhNRT2.1e	GbNRT2.1d	WGD
GhNRT2.1e	GbNRT2.1f	WGD
GhNRT2.4a	GbNRT2.3a	WGD
GhNRT2.4a	GbNRT2.1c	WGD
GhNRT2.4a	GbNRT2.1e	WGD
GhNRT2.4a	GbNRT2.4a	WGD
GhNRT2.4a	GbNRT2.1b	WGD
GhNRT2.4a	GbNRT2.4b	WGD
GhNRT2.5a	GbNRT2.5a	WGD
GhNRT2.5a	GbNRT2.5b	WGD
GhNRT2.1b	GbNRT2.3a	WGD
GhNRT2.1b	GbNRT2.1c	WGD
GhNRT2.1b	GbNRT2.1e	WGD
GhNRT2.1b	GbNRT2.4a	WGD
GhNRT2.1b	GbNRT2.1b	WGD
GhNRT2.1b	GbNRT2.1d	WGD
GhNRT2.1b	GbNRT2.1f	WGD
GhNRT2.1b	GbNRT2.4b	WGD
GhNRT2.1d	GbNRT2.3a	WGD
GhNRT2.1d	GbNRT2.1c	WGD
GhNRT2.1d	GbNRT2.1b	WGD
GhNRT2.1d	GbNRT2.1f	WGD
GhNRT2.1d	GbNRT2.4b	WGD
GhNRT2.7b	GbNRT2.7a	WGD
GhNRT2.7b	GbNRT2.7b	WGD
GhNRT2.1f	GbNRT2.3a	WGD
GhNRT2.1f	GbNRT2.1c	WGD
GhNRT2.1f	GbNRT2.1e	WGD
GhNRT2.1f	GbNRT2.1b	WGD
GhNRT2.1f	GbNRT2.1d	WGD
GhNRT2.1f	GbNRT2.1f	WGD
GhNRT2.4b	GbNRT2.3a	WGD
GhNRT2.4b	GbNRT2.1c	WGD
GhNRT2.4b	GbNRT2.1e	WGD
GhNRT2.4b	GbNRT2.4a	WGD
GhNRT2.4b	GbNRT2.1b	WGD
GhNRT2.4b	GbNRT2.4b	WGD
GhNRT2.5b	GbNRT2.5a	WGD
GhNRT2.5b	GbNRT2.5b	WGD
