# Supplementary material for: Functional characterization of the GhNRT2.1e gene reveals its significant role in improving nitrogen use efficiency in Gossypium hirsutum
Source: PeerJ. 2023 Mar 28;11:e15152. doi: 10.7717/peerj.15152 (PMC10064996; doi:10.7717/peerj.15152)
Supplement: Supplemental Information 4 [file peerj-11-15152-s004.xlsx]

## Sheet: Sheet1
Table S4. Ka/Ks Values of all duplicated gene pairs from four Gossypium species
Gh-Gh							Gh-Gb							Gh-Ga							Gh-Gr							Gb-Gb							Gb-Ga							Gb-Gr
Gene Name	Gene Name	Ka	Ks	Ka/Ks	Purifying Selection		Gene Name	Gene Name	Ka	Ks	Ka/Ks	Purifying Selection		Gene Name	Gene Name	Ka	Ks	Ka/Ks	Purifying Selection		Gene Name	Gene Name	Ka	Ks	Ka/Ks	Purifying Selection		Gene Name	Gene Name	Ka	Ks	Ka/Ks	Purifying Selection		Gene Name	Gene Name	Ka	Ks	Ka/Ks	Purifying Selection		Gene Name	Gene Name	Ka	Ks	Ka/Ks	Purifying Selection
GhNRT2.3a	GhNRT2.1d	0.142978	1.91556	0.0746402	Yes		GhNRT2.3a	GbNRT2.3a	0.00082203	0.00256301	0.320729	Yes		GhNRT2.3a	GaNRT2.3	0.00082203	0.00513481	0.16009	Yes		GhNRT2.3a	GrNRT2.1a	0.133257	2.11423	0.0630287	Yes		GbNRT2.3a	GbNRT2.1c	0.142891	1.93109	0.0739949	Yes		GbNRT2.3a	GaNRT2.3	0	0.00772208	0	Yes		GbNRT2.3a	GrNRT2.1a	0.132224	2.16972	0.0609408	Yes
GhNRT2.3a	GhNRT2.1e	0.131032	1.95885	0.0668924	Yes		GhNRT2.3a	GbNRT2.1c	0.14394	1.89037	0.076144	Yes		GhNRT2.3a	GaNRT2.1b	0.14394	1.9577	0.073525	Yes		GhNRT2.3a	GrNRT2.1b	0.132392	2.01124	0.0658261	Yes		GbNRT2.3a	GbNRT2.1e	0.130004	2.00367	0.0648831	Yes		GbNRT2.3a	GaNRT2.1b	0.142891	2.00243	0.0713586	Yes		GbNRT2.3a	GrNRT2.1b	0.131362	2.05942	0.0637859	Yes
GhNRT2.3a	GhNRT2.4a	0.176913	NaN	NaN	Yes		GhNRT2.3a	GbNRT2.1e	0.131032	1.95885	0.0668924	Yes		GhNRT2.3a	GaNRT2.1c	0.131032	1.92436	0.0680912	Yes		GhNRT2.3a	GrNRT2.4	0.175766	NaN	NaN	Yes		GbNRT2.3a	GbNRT2.4a	0.178936	NaN	NaN	Yes		GbNRT2.3a	GaNRT2.1c	0.130004	1.96708	0.0660901	Yes		GbNRT2.3a	GrNRT2.4	0.174662	NaN	NaN	Yes
GhNRT2.3a	GhNRT2.1b	0.133257	2.1588	0.0617275	Yes		GhNRT2.3a	GbNRT2.4a	0.180047	NaN	NaN	Yes		GhNRT2.3a	GaNRT2.4	0.177966	NaN	NaN	Yes		GhNRT2.3a	GrNRT2.1c	0.143962	1.9895	0.072361	Yes		GbNRT2.3a	GbNRT2.1b	0.132224	2.21786	0.0596179	Yes		GbNRT2.3a	GaNRT2.4	0.176858	NaN	NaN	Yes		GbNRT2.3a	GrNRT2.1c	0.142913	2.03624	0.0701847	Yes
GhNRT2.3a	GhNRT2.1f	0.146356	1.50737	0.0970937	Yes		GhNRT2.3a	GbNRT2.1b	0.133257	2.1588	0.0617275	Yes		GhNRT2.1d	GaNRT2.3	0.14193	1.9577	0.0724982	Yes		GhNRT2.7a	GrNRT2.7	0.0107695	0.0619707	0.173784	Yes		GbNRT2.3a	GbNRT2.1d	0.142913	1.99809	0.0715245	Yes		GbNRT2.1c	GaNRT2.3	0.142891	1.93109	0.0739949	Yes		GbNRT2.1c	GrNRT2.1a	0.0279299	1.06808	0.0261497	Yes
GhNRT2.3a	GhNRT2.4b	0.173615	NaN	NaN	Yes		GhNRT2.3a	GbNRT2.1d	0.143962	1.95364	0.0736893	Yes		GhNRT2.1d	GaNRT2.1b	0.00458017	0.0331472	0.138176	Yes		GhNRT2.7a	GrNRT2.5	0.308467	3.17484	0.0971597	Yes		GbNRT2.3a	GbNRT2.1f	0.131362	2.02011	0.0650272	Yes		GbNRT2.1c	GaNRT2.1b	0	0.0130495	0	Yes		GbNRT2.1c	GrNRT2.1b	0.0283372	0.573647	0.0493983	Yes
GhNRT2.1d	GhNRT2.1e	0.0244679	0.565329	0.0432808	Yes		GhNRT2.3a	GbNRT2.1f	0.132392	1.97435	0.0670561	Yes		GhNRT2.1d	GaNRT2.1c	0.0244679	0.57644	0.0424465	Yes		GhNRT2.1e	GrNRT2.1a	0.0240561	1.00216	0.0240043	Yes		GbNRT2.3a	GbNRT2.4b	0.173588	NaN	NaN	Yes		GbNRT2.1c	GaNRT2.1c	0.0266075	0.580001	0.045875	Yes		GbNRT2.1c	GrNRT2.4	0.139837	2.78994	0.0501219	Yes
GhNRT2.7a	GhNRT2.7b	0.0107678	0.0587778	0.183195	Yes		GhNRT2.3a	GbNRT2.4b	0.17469	NaN	NaN	Yes		GhNRT2.1d	GaNRT2.4	0.141051	2.67193	0.05279	Yes		GhNRT2.1e	GrNRT2.1b	0.00332733	0.029117	0.114274	Yes		GbNRT2.1c	GbNRT2.1e	0.0266075	0.568827	0.0467761	Yes		GbNRT2.1c	GaNRT2.4	0.139413	2.91414	0.0478402	Yes		GbNRT2.1c	GrNRT2.1c	0.00374481	0.0277565	0.134917	Yes
GhNRT2.1e	GhNRT2.4a	0.135829	2.63021	0.0516418	Yes		GhNRT2.1d	GbNRT2.1e	0.0244679	0.565329	0.0432808	Yes		GhNRT2.7a	GaNRT2.7	0.00391998	0.00898438	0.43631	Yes		GhNRT2.1e	GrNRT2.4	0.13725	2.34076	0.0586346	Yes		GbNRT2.1c	GbNRT2.4a	0.141386	2.92972	0.0482593	Yes		GbNRT2.7a	GaNRT2.7	0.0058896	0.0119913	0.491158	Yes		GbNRT2.7a	GrNRT2.7	0.0127485	0.0651404	0.195709	Yes
GhNRT2.1e	GhNRT2.1b	0.0240561	1.00216	0.0240043	Yes		GhNRT2.1d	GbNRT2.4a	0.143037	2.68312	0.0533099	Yes		GhNRT2.1e	GaNRT2.1b	0.0266075	0.557818	0.0476993	Yes		GhNRT2.1e	GrNRT2.1c	0.0253224	0.565694	0.0447635	Yes		GbNRT2.1c	GbNRT2.1b	0.0279299	1.0574	0.0264137	Yes		GbNRT2.7a	GaNRT2.5	0.312862	NaN	NaN	Yes		GbNRT2.7a	GrNRT2.5	0.309572	3.19272	0.0969618	Yes
GhNRT2.1e	GhNRT2.1f	0.00872761	0.0430338	0.202808	Yes		GhNRT2.1d	GbNRT2.1d	0.000830795	0.00259741	0.319856	Yes		GhNRT2.1e	GaNRT2.1c	0	0.00783638	0	Yes		GhNRT2.4a	GrNRT2.1a	0.137739	2.74961	0.050094	Yes		GbNRT2.1c	GbNRT2.1d	0.00374481	0.0304543	0.122965	Yes		GbNRT2.1e	GaNRT2.1b	0.0266075	0.557818	0.0476993	Yes		GbNRT2.1e	GrNRT2.1a	0.0240561	1.00216	0.0240043	Yes
GhNRT2.1e	GhNRT2.4b	0.137208	2.29717	0.059729	Yes		GhNRT2.7a	GbNRT2.7a	0.00389864	0.00297915	1.30864	NO		GhNRT2.1e	GaNRT2.4	0.136824	2.72216	0.0502631	Yes		GhNRT2.4a	GrNRT2.1b	0.137198	2.66781	0.0514272	Yes		GbNRT2.1c	GbNRT2.1f	0.0283372	0.568091	0.0498814	Yes		GbNRT2.1e	GaNRT2.1c	0	0.00783638	0	Yes		GbNRT2.1e	GrNRT2.1b	0.00332733	0.029117	0.114274	Yes
GhNRT2.4a	GhNRT2.1b	0.137739	2.74961	0.050094	Yes		GhNRT2.7a	GbNRT2.7b	0.0117601	0.058687	0.200388	Yes		GhNRT2.4a	GaNRT2.1c	0.135829	2.63021	0.0516418	Yes		GhNRT2.4a	GrNRT2.4	0.00406092	0.0286431	0.141777	Yes		GbNRT2.1c	GbNRT2.4b	0.138821	2.70153	0.051386	Yes		GbNRT2.1e	GaNRT2.4	0.136824	2.72216	0.0502631	Yes		GbNRT2.1e	GrNRT2.4	0.13725	2.34076	0.0586346	Yes
GhNRT2.4a	GhNRT2.1d	0.140049	2.76936	0.050571	Yes		GhNRT2.1e	GbNRT2.3a	0.130004	2.00367	0.0648831	Yes		GhNRT2.4a	GaNRT2.4	0.000810811	0.00769238	0.105404	Yes		GhNRT2.4a	GrNRT2.1c	0.139028	2.78216	0.0499713	Yes		GbNRT2.7a	GbNRT2.5a	0.312862	4.32932	0.0722659	Yes		GbNRT2.4a	GaNRT2.1c	0.138798	2.55774	0.0542659	Yes		GbNRT2.1e	GrNRT2.1c	0.0253224	0.565694	0.0447635	Yes
GhNRT2.4a	GhNRT2.1f	0.108439	2.07184	0.0523396	Yes		GhNRT2.1e	GbNRT2.1c	0.0266075	0.568827	0.0467761	Yes		GhNRT2.5a	GaNRT2.7	0.309662	3.74172	0.0827592	Yes		GhNRT2.5a	GrNRT2.7	0.307059	NaN	NaN	Yes		GbNRT2.7a	GbNRT2.7b	0.0137427	0.0618429	0.22222	Yes		GbNRT2.4a	GaNRT2.4	0.00324808	0.00512166	0.634184	Yes		GbNRT2.4a	GrNRT2.1a	0.140719	2.66565	0.0527899	Yes
GhNRT2.4a	GhNRT2.4b	0.00405982	0.028668	0.141615	Yes		GhNRT2.1e	GbNRT2.1e	0	0	NaN	Yes		GhNRT2.5a	GaNRT2.5	0	0.00533573	0	Yes		GhNRT2.5a	GrNRT2.5	0.00703869	0.0298344	0.235925	Yes		GbNRT2.1e	GbNRT2.4a	0.138798	2.55774	0.0542659	Yes		GbNRT2.5a	GaNRT2.7	0.309662	3.74172	0.0827592	Yes		GbNRT2.4a	GrNRT2.1b	0.140174	2.59188	0.0540818	Yes
GhNRT2.5a	GhNRT2.5b	0.00439272	0.0298075	0.14737	Yes		GhNRT2.1e	GbNRT2.1b	0.0240561	1.00216	0.0240043	Yes		GaNRT2.3	GhNRT2.1b	0.132224	2.16972	0.0609408	Yes		GrNRT2.7	GhNRT2.7b	0.00194679	0.00297915	0.653471	Yes		GbNRT2.1e	GbNRT2.1b	0.0240561	1.00216	0.0240043	Yes		GbNRT2.5a	GaNRT2.5	0	0.00533573	0	Yes		GbNRT2.4a	GrNRT2.4	0.00650719	0.0260048	0.250231	Yes
GhNRT2.1b	GhNRT2.1d	0.0275066	1.03972	0.0264558	Yes		GhNRT2.1e	GbNRT2.1d	0.0253224	0.560194	0.0452029	Yes		GaNRT2.1b	GhNRT2.1b	0.0279299	1.04687	0.0266793	Yes		GrNRT2.7	GhNRT2.5b	0.30416	4.12423	0.0737495	Yes		GbNRT2.1e	GbNRT2.1d	0.0253224	0.560194	0.0452029	Yes		GaNRT2.1b	GbNRT2.1b	0.0279299	1.04687	0.0266793	Yes		GbNRT2.4a	GrNRT2.1c	0.142011	2.69448	0.0527043	Yes
GhNRT2.1b	GhNRT2.1f	0.0256035	1.06638	0.0240097	Yes		GhNRT2.1e	GbNRT2.1f	0.00332733	0.029117	0.114274	Yes		GaNRT2.1b	GhNRT2.1f	0.0238323	0.502711	0.0474075	Yes		GrNRT2.1a	GhNRT2.1b	0	0.00778217	0	Yes		GbNRT2.1e	GbNRT2.1f	0.00332733	0.029117	0.114274	Yes		GaNRT2.1b	GbNRT2.1d	0.00374481	0.0304543	0.122965	Yes		GbNRT2.5a	GrNRT2.7	0.307059	NaN	NaN	Yes
GhNRT2.1b	GhNRT2.4b	0.137125	2.43674	0.056274	Yes		GhNRT2.4a	GbNRT2.3a	0.175807	NaN	NaN	Yes		GaNRT2.7	GhNRT2.7b	0.00884966	0.055581	0.159221	Yes		GrNRT2.1a	GhNRT2.1d	0.0275066	1.05014	0.0261933	Yes		GbNRT2.1e	GbNRT2.4b	0.136233	2.29058	0.0594755	Yes		GaNRT2.1b	GbNRT2.1f	0.0283372	0.557102	0.0508653	Yes		GbNRT2.5a	GrNRT2.5	0.00703869	0.0298344	0.235925	Yes
GhNRT2.1d	GhNRT2.1f	0.0225115	0.510235	0.0441198	Yes		GhNRT2.4a	GbNRT2.1c	0.138418	3.05193	0.0453541	Yes		GaNRT2.1c	GhNRT2.1b	0.0240561	1.02213	0.0235353	Yes		GrNRT2.1a	GhNRT2.1f	0.0256035	1.06638	0.0240097	Yes		GbNRT2.4a	GbNRT2.1b	0.140719	2.66565	0.0527899	Yes		GaNRT2.7	GbNRT2.7b	0.00984428	0.0554953	0.177389	Yes		GrNRT2.7	GbNRT2.7b	0.00292351	0.00297472	0.982784	Yes
GhNRT2.1d	GhNRT2.4b	0.138933	2.5589	0.0542941	Yes		GhNRT2.4a	GbNRT2.1e	0.135829	2.63021	0.0516418	Yes		GaNRT2.1c	GhNRT2.1f	0.00872761	0.0517264	0.168726	Yes		GrNRT2.1a	GhNRT2.4b	0.137125	2.43674	0.056274	Yes		GbNRT2.4a	GbNRT2.1f	0.140174	2.67894	0.0523244	Yes		GaNRT2.1c	GbNRT2.1b	0.0240561	1.02213	0.0235353	Yes		GrNRT2.7	GbNRT2.5b	0.30416	4.12423	0.0737495	Yes
							GhNRT2.4a	GbNRT2.4a	0.00243474	0.00255646	0.952387	Yes		GaNRT2.1c	GhNRT2.4b	0.137208	2.29717	0.059729	Yes		GrNRT2.1b	GhNRT2.1b	0.0260675	1.03725	0.0251315	Yes		GbNRT2.4a	GbNRT2.4b	0.00568993	0.0233735	0.243435	Yes		GaNRT2.1c	GbNRT2.1d	0.0253224	0.571234	0.0443293	Yes		GrNRT2.1a	GbNRT2.1b	0	0.00778217	0	Yes
							GhNRT2.4a	GbNRT2.1b	0.137739	2.74961	0.050094	Yes		GaNRT2.4	GhNRT2.1b	0.138738	2.74961	0.0504574	Yes		GrNRT2.1b	GhNRT2.1d	0.0261925	0.570125	0.0459416	Yes		GbNRT2.5a	GbNRT2.7b	0.309634	NaN	NaN	Yes		GaNRT2.1c	GbNRT2.1f	0.00332733	0.0345347	0.0963476	Yes		GrNRT2.1a	GbNRT2.1d	0.0283652	1.05113	0.0269855	Yes
							GhNRT2.4a	GbNRT2.4b	0.00324654	0.0260048	0.124844	Yes		GaNRT2.4	GhNRT2.1f	0.106779	2.01077	0.0531036	Yes		GrNRT2.1b	GhNRT2.1f	0.0067808	0.0154485	0.438928	Yes		GbNRT2.5a	GbNRT2.5b	0.00439272	0.0298075	0.14737	Yes		GaNRT2.1c	GbNRT2.4b	0.136233	2.29058	0.0594755	Yes		GrNRT2.1a	GbNRT2.1f	0.0260675	1.01689	0.0256345	Yes
							GhNRT2.5a	GbNRT2.5a	0	0	NaN	Yes		GaNRT2.4	GhNRT2.4b	0.00487443	0.0313293	0.155587	Yes		GrNRT2.1b	GhNRT2.4b	0.138579	2.38111	0.0581994	Yes		GbNRT2.1b	GbNRT2.1d	0.0283652	1.04069	0.0272561	Yes		GaNRT2.4	GbNRT2.1b	0.138738	2.74961	0.0504574	Yes		GrNRT2.1a	GbNRT2.4b	0.13615	2.42877	0.0560571	Yes
							GhNRT2.5a	GbNRT2.5b	0.00439272	0.0298075	0.14737	Yes		GaNRT2.5	GhNRT2.5b	0.00439272	0.0353566	0.12424	Yes		GrNRT2.4	GhNRT2.1b	0.137167	2.56446	0.0534877	Yes		GbNRT2.1b	GbNRT2.1f	0.0260675	1.01689	0.0256345	Yes		GaNRT2.4	GbNRT2.1f	0.138196	2.87603	0.0480508	Yes		GrNRT2.1b	GbNRT2.1b	0.0260675	1.03725	0.0251315	Yes
							GhNRT2.1b	GbNRT2.3a	0.132224	2.21786	0.0596179	Yes									GrNRT2.4	GhNRT2.1d	0.138975	2.62108	0.0530221	Yes		GbNRT2.1b	GbNRT2.4b	0.13615	2.42877	0.0560571	Yes		GaNRT2.4	GbNRT2.4b	0.00406037	0.0286555	0.141696	Yes		GrNRT2.1b	GbNRT2.1d	0.027049	0.564964	0.0478774	Yes
							GhNRT2.1b	GbNRT2.1c	0.0279299	1.0574	0.0264137	Yes									GrNRT2.4	GhNRT2.1f	0.109915	1.90262	0.0577701	Yes		GbNRT2.1d	GbNRT2.1f	0.027049	0.559475	0.0483471	Yes		GaNRT2.5	GbNRT2.5b	0.00439272	0.0353566	0.12424	Yes		GrNRT2.1b	GbNRT2.1f	0	0.00520609	0	Yes
							GhNRT2.1b	GbNRT2.1e	0.0240561	1.00216	0.0240043	Yes									GrNRT2.4	GhNRT2.4b	0.00162053	0.0103139	0.157121	Yes		GbNRT2.1f	GbNRT2.4b	0.137603	2.3737	0.0579697	Yes									GrNRT2.1b	GbNRT2.4b	0.137603	2.3737	0.0579697	Yes
							GhNRT2.1b	GbNRT2.4a	0.140719	2.66565	0.0527899	Yes									GrNRT2.5	GhNRT2.7b	0.306906	3.41812	0.0897881	Yes																GrNRT2.4	GbNRT2.1b	0.137167	2.56446	0.0534877	Yes
							GhNRT2.1b	GbNRT2.1b	0	0	NaN	Yes									GrNRT2.5	GhNRT2.5b	0.00263235	0.0161152	0.163346	Yes																GrNRT2.4	GbNRT2.1f	0.138621	2.4299	0.0570481	Yes
							GhNRT2.1b	GbNRT2.1d	0.0283652	1.04069	0.0272561	Yes									GrNRT2.1c	GhNRT2.1b	0.0283652	1.05113	0.0269855	Yes																GrNRT2.4	GbNRT2.4b	0.000809935	0.00771876	0.104931	Yes
							GhNRT2.1b	GbNRT2.1f	0.0260675	1.01689	0.0256345	Yes									GrNRT2.1c	GhNRT2.1d	0.000830795	0.00520384	0.15965	Yes																GrNRT2.5	GbNRT2.7b	0.306602	3.40759	0.089976	Yes
							GhNRT2.1b	GbNRT2.4b	0.13615	2.42877	0.0560571	Yes									GrNRT2.1c	GhNRT2.1f	0.0238323	0.518841	0.0459337	Yes																GrNRT2.5	GbNRT2.5b	0.00263235	0.0161152	0.163346	Yes
							GhNRT2.1d	GbNRT2.3a	0.14193	1.9577	0.0724982	Yes									GrNRT2.1c	GhNRT2.4b	0.137914	2.56848	0.0536947	Yes																GrNRT2.1c	GbNRT2.1b	0.0283652	1.05113	0.0269855	Yes
							GhNRT2.1d	GbNRT2.1c	0.00458017	0.0331472	0.138176	Yes																														GrNRT2.1c	GbNRT2.1d	0	0.00259853	0	Yes
							GhNRT2.1d	GbNRT2.1b	0.0275066	1.03972	0.0264558	Yes																														GrNRT2.1c	GbNRT2.1f	0.027049	0.564964	0.0478774	Yes
							GhNRT2.1d	GbNRT2.1f	0.0261925	0.5646	0.0463912	Yes																														GrNRT2.1c	GbNRT2.4b	0.136938	2.5589	0.0535146	Yes
							GhNRT2.1d	GbNRT2.4b	0.137956	2.54944	0.0541123	Yes
							GhNRT2.7b	GbNRT2.7a	0.0127464	0.0619387	0.205791	Yes
							GhNRT2.7b	GbNRT2.7b	0.00292303	0	#NAME?	Yes
							GhNRT2.1f	GbNRT2.3a	0.144726	1.51398	0.0955927	Yes
							GhNRT2.1f	GbNRT2.1c	0.0238323	0.510732	0.0466629	Yes
							GhNRT2.1f	GbNRT2.1e	0.00872761	0.0430338	0.202808	Yes
							GhNRT2.1f	GbNRT2.1b	0.0256035	1.06638	0.0240097	Yes
							GhNRT2.1f	GbNRT2.1d	0.0238323	0.510732	0.0466629	Yes
							GhNRT2.1f	GbNRT2.1f	0.0067808	0.00716974	0.945753	Yes
							GhNRT2.4b	GbNRT2.3a	0.172516	NaN	NaN	Yes
							GhNRT2.4b	GbNRT2.1c	0.139795	2.71317	0.0515245	Yes
							GhNRT2.4b	GbNRT2.1e	0.137208	2.29717	0.059729	Yes
							GhNRT2.4b	GbNRT2.4a	0.00650543	0.0260273	0.249946	Yes
							GhNRT2.4b	GbNRT2.1b	0.137125	2.43674	0.056274	Yes
							GhNRT2.4b	GbNRT2.4b	0.000809717	0.0025663	0.315519	Yes
							GhNRT2.5b	GbNRT2.5a	0.00439272	0.0298075	0.14737	Yes
							GhNRT2.5b	GbNRT2.5b	0	0	NaN	Yes
