# Supplementary material for: Functional characterization of the GhNRT2.1e gene reveals its significant role in improving nitrogen use efficiency in Gossypium hirsutum
Source: PeerJ. 2023 Mar 28;11:e15152. doi: 10.7717/peerj.15152 (PMC10064996; doi:10.7717/peerj.15152)
Supplement: Supplemental Information 5 [file peerj-11-15152-s005.xlsx]

## Sheet: Sheet1
Table S5 Cis-elements statistics of GhNRT2 genes in upstream promoter regions
Type	Function	GhNRT2.1a	GhNRT2.1b	GhNRT2.1c	GhNRT2.1d	GhNRT2.1e	GhNRT2.1f	GhNRT2.3a	GhNRT2.3b	GhNRT2.4a	GhNRT2.4b	GhNRT2.5a	GhNRT2.5b	GhNRT2.7a	GhNRT2.7b
Light responsive related element	Light responsive element	7	7	14	12	5	12	13	16	6	6	15	15	12	10
Hormone responsive elements	MeJA-responsiveness element	4	6	2	0	2	4	0	0	0	0	0	2	6	4
	Gibberellin-responsiveness element	1	1	1	1	2	1	1	1	2	3	0	0	4	0
	Abscisic acid responsiveness element	2	3	0	0	2	2	1	2	2	4	4	4	0	1
	Auxin responsiveness element	2	2	0	0	0	0	2	3	0	0	1	0	0	0
	Salicylic acid responsiveness element	1	1	1	0	0	0	1	0	1	0	0	0	1	3
Stress related elements	Anaerobic induction element	0	1	0	0	3	6	2	1	2	2	5	5	4	3
	Defense and stress responsiveness element	0	0	0	0	0	1	0	0	0	0	2	2	1	0
	Drought induction element	0	0	1	1	2	2	0	0	0	0	0	0	1	2
	Low-temperature responsiveness element	0	0	0	0	0	0	3	0	0	0	1	1	0	0
	Anoxic specific inducibility element	0	0	0	0	0	0	0	1	0	0	0	0	0	0
Plant development related elements	Seed-specific regulation element	1	0	0	0	1	0	0	0	0	0	0	0	1	1
	Circadian control element	0	1	0	0	1	0	0	0	0	1	0	0	0	2
	Zein metabolism regulation element	0	0	0	0	2	0	0	0	0	0	0	0	0	0
	Meristem expression element	0	2	0	0	1	0	0	0	1	1	0	0	0	2
	Endosperm expression element	1	0	0	0	0	0	0	0	0	0	0	0	0	1
