# Supplementary material for: Functional characterization of the GhNRT2.1e gene reveals its significant role in improving nitrogen use efficiency in Gossypium hirsutum
Source: PeerJ. 2023 Mar 28;11:e15152. doi: 10.7717/peerj.15152 (PMC10064996; doi:10.7717/peerj.15152)
Supplement: Supplemental Information 6 — These data were used for statistical analysis to analyze the expression patterns of GhNRT2 genes and the function of GhNRT2.1e gene. [file peerj-11-15152-s006.xlsx]

## Sheet: Table S6-1
Table S6-1 Raw qRT-PCR data of GhNRT2 genes in roots, stems and leaves.
	GhActin	GhNRT2.1a	GhNRT2.1b	GhNRT2.1c	GhNRT2.1d	GhNRT2.1e	GhNRT2.3b	GhNRT2.4b	GhNRT2.5a	GhNRT2.5b	GhNRT2.7a	GhNRT2.7b
Root	20.2637	28.5685	25.5868	23.6832	22.9503	24.2682	29.2259	30.9003	26.3875	25.9676	32.781	31.8644
Root	19.9932	28.5669	25.5559	23.681	22.9547	24.128	29.2346	30.5765	26.3005	25.8736	33.5604	32.9018
Root	19.953	28.4937	25.3928	23.451	22.9288	24.0155	29.2378	30.5812	26.2525	25.8623	33.2423	32.5211
Stem	19.6863	34.3246	32.7589	31.3409	31.1425	31.5603	33.7578	32.7649	27.8905	26.8849	30.2882	31.732
Stem	19.7643	33.7748	33.362	32.0602	30.9631	30.4092	33.2774	32.1706	27.825	27.1519	30.4293	32.2008
Stem	19.9241	33.5928	32.4821	31.1732	31.5939	30.4093	33.4284	32.9217	28.0372	27.1123	30.8618	31.2522
Leaf	20.0288	34.3856	33.1267	32.0432	33.2691	33.289	30.7876	34.2337	28.5499	27.4125	26.9731	26.885
Leaf	20.046	34.5926	32.212	32.5336	31.4296	32.7054	31.0263	34.3334	29.2461	27.4169	27.1689	26.9125
Leaf	20.0298	34.5991	31.7039	33	31.83	32.4701	30.8703	34.1833	28.708	27.1637	27.0729	27.113

## Sheet: Table S6-2
Table S6-2 Raw qRT-PCR data of GhNRT2 genes in roots after treatment with low nitrate.
	GhActin	GhNRT2.1	GhNRT2.1b	GhNRT2.1c			GhActin	GhNRT2.1d	GhNRT2.1e	GhNRT2.3b			GhActin	GhNRT2.4b	GhNRT2.5a	GhNRT2.5b
0h	20.3672	29.1068	29.2646	28.0282		0h	21.1846	28.8798	28.8538	29.0646		0h	21.6857	27.1829	26.1735	27.6911
0h	20.4145	29.1571	29.2405	27.9311		0h	21.2253	28.7228	29.1567	28.9405		0h	21.6944	26.9356	26.2237	27.6411
0h	20.32	29.0927	29.3178	28.2772		0h	21.2123	28.8347	29.1711	29.0178		0h	21.6558	27.0302	26.4137	27.5033
1h	21.2783	25.4804	25.3004	24.6272		1h	21.6306	23.8477	23.3547	29.2004		1h	21.8037	27.0672	26.5563	27.9282
1h	21.5143	25.2891	25.2212	25.0325		1h	21.7493	23.8707	23.6781	29.4212		1h	21.9465	27.1213	26.7114	28.0957
1h	21.4158	25.4727	25.1775	25.0223		1h	21.8832	23.6302	23.5874	29.4775		1h	22.0907	27.2054	26.9297	28.2393
3h	20.7583	23.1359	22.6654	22.945		3h	22.203	23.216	22.665	29.7854		3h	21.9279	27.2417	27.2467	28.3076
3h	20.5237	23.0425	22.5362	22.5251		3h	22.3171	23.3349	22.8902	29.7262		3h	22.0039	27.1417	27.3504	28.4958
3h	20.5396	22.8158	22.629	22.4117		3h	22.4873	23.221	23.0257	29.959		3h	22.0142	27.3417	27.2529	28.4467
6h	21.1891	23.6942	23.1453	22.6324		6h	21.8228	22.2268	22.0915	29.3453		6h	21.3416	26.8231	27.1532	28.527
6h	20.9525	23.4108	22.9019	22.531		6h	21.736	22.1823	22.1251	29.3219		6h	21.0557	26.6958	27.0132	28.1248
6h	20.9008	23.604	22.9467	22.36		6h	21.7681	22.2995	22.101	29.2467		6h	21.2146	26.6809	27.2735	28.2403
12h	21.2617	24.4015	23.5528	23.1389		12h	22.4713	23.6566	23.2474	30.0528		12h	22.1577	27.8578	28.2591	29.7783
12h	21.4027	24.2674	23.5551	23.107		12h	22.4213	23.6465	23.0802	29.9951		12h	22.4381	28.0915	28.3899	29.8649
12h	21.2832	24.3569	23.5308	22.941		12h	22.5081	23.6555	23.3067	30.2308		12h	22.3208	28.0701	28.5561	29.8332
24h	21.2202	24.4522	24.0797	24.3204		24h	22.658	25.5285	24.3056	30.2797		24h	22.4056	28.4475	28.9807	30.3613
24h	21.1822	24.5944	24.19	23.9739		24h	22.7557	25.2715	24.481	30.35		24h	22.6704	28.339	28.8343	31.1931
24h	20.873	23.8723	23.7887	24.0672		24h	22.6157	25.5273	24.3401	30.2887		24h	22.3886	28.2839	28.837	31.082
48h	21.1893	25.7278	26.1284	25.1238		48h	21.918	26.2231	25.1339	29.6284		48h	21.7179	27.8256	28.5208	31.2515
48h	20.7781	26.222	25.108	25.1023		48h	21.781	25.5719	25.7928	29.408		48h	21.6685	27.8808	28.3231	31.4348
48h	20.9971	25.7645	26.263	25.7464		48h	21.8926	26.1024	24.966	29.683		48h	21.7957	27.8165	28.8309	31.266

## Sheet: Table S6-3
Table S6-3 Raw data of overexpressed Arabidopsis and WT plants.
Table S6-3-1 Raw data of dry weight in Arabidopsis thaliana.
CK					Low nitrate
Repeat	WT	OE-1	OE-2	OE-3	Repeat	WT	OE-1	OE-2	OE-3
1	0.687	0.722	0.708	0.679	1	0.482	0.562	0.575	0.562
2	0.704	0.773	0.671	0.721	2	0.489	0.573	0.629	0.618
3	0.642	0.713	0.729	0.718	3	0.472	0.572	0.585	0.579
4	0.654	0.78	0.691	0.684	4	0.502	0.547	0.581	0.623
5	0.734	0.625	0.739	0.716	5	0.484	0.584	0.599	0.607
6	0.714	0.702	0.718	0.681	6	0.464	0.559	0.579	0.595
7	0.678	0.658	0.828	0.718	7	0.462	0.599	0.547	0.565
8	0.653	0.686	0.721	0.658	8	0.472	0.565	0.574	0.581
9	0.672	0.661	0.731	0.681	9	0.482	0.581	0.571	0.564
10	0.627	0.708	0.674	0.683	10	0.489	0.545	0.568	0.535
mean	0.6765	0.7028	0.721	0.6939		0.4798	0.5687	0.5808	0.5829
standard deviation	0.0338305	0.0488508	0.0443772	0.0222234		0.012372	0.0167269	0.0214932	0.0278785
p-value		0.178623	0.021318	0.190813			7.30093e-11	1.60436e-10	3.17098e-09
Table S6-3-2 Raw data of total nitrogen content in Arabidopsis thaliana.
CK					Low nitrate
Repeat	WT	OE-1	OE-2	OE-3	Repeat	WT	OE-1	OE-2	OE-3
1	36.556	36.286	36.766	35.987	1	31.377	32.422	33.48	33.493
2	35.913	37.367	36.368	35.787	2	29.16	33.014	34.611	35.58
3	35.201	36.714	37.211	36.109	3	30.963	32.43	33.702	33.262
4	36.673	38.362	37.156	37.918	4	28.241	34.715	33.585	32.31
5	35.422	36.354	36.085	38.859	5	30.115	33.343	32.344	34.793
6	35.688	37.585	37.918	36.267	6	30.351	31.569	34.184	33.22
7	38.274	37.656	37.794	36.934	7	29.354	34.36	33.508	33.585
8	35.243	37.285	36.731	35.757	8	27.918	32.267	33.38	34.686
9	38.754	38.801	37.27	37.897	9	28.859	33.168	32.768	32.732
10	35.393	37.989	38.296	39.764	10	29.453	32.932	34.817	32.786
mean	36.3117	37.4399	37.1595	37.1279		29.5791	33.022	33.6379	33.6447
standard deviation	1.27214	0.825902	0.699515	1.41254		1.12255	0.953398	0.758768	1.04634
p-value		0.0302426	0.0813004	0.191315			7.40738e-07	2.04171e-08	1.26235e-07
Table S6-3-3 Raw data of nitrate content in Arabidopsis thaliana.
CK					Low nitrate
Repeat	WT	OE-1	OE-2	OE-3	Repeat	WT	OE-1	OE-2	OE-3
1	758.896	780.138	771.8	763.232	1	535.522	602.127	605.858	615.38
2	743.334	752.803	768.118	822.421	2	544.174	594.294	611.536	603.496
3	748.315	765.37	772.26	745.12	3	550.903	612.348	635.89	599.72
4	775.447	767.381	758.236	778.343	4	548.993	625.805	617.57	630.363
5	752.337	762.254	752.41	754.458	5	557.372	595.441	609.528	638.681
6	745.35	752.367	771.045	754.94	6	542.227	636.332	593.466	626.451
7	763.575	765.533	792.803	786.118	7	527.504	633.347	614.34	598.502
8	772.484	793.183	782.456	790.261	8	539.526	635.01	600.695	625.269
9	742.048	797.545	784.333	789.286	9	545.05	617.313	642.897	597.136
10	788.542	763.814	761.275	753.71	10	547.838	608.166	602.448	612.568
mean	759.033	770.039	771.474	773.789		543.911	616.018	613.423	614.757
standard deviation	15.7186	15.4636	12.4533	23.8393		8.3953	16.1057	15.4496	14.8921
p-value		0.131881	0.0654414	0.119597			2.42994e-10	2.60364e-10	1.20717e-10
Table S6-3-4 Raw data of total nitrogen accumulation in Arabidopsis thaliana.
CK					Low nitrate
Repeat	WT	OE-1	OE-2	OE-3	Repeat	WT	OE-1	OE-2	OE-3
1	25.114	26.1985	26.0303	24.4352	1	15.1237	18.2212	19.251	18.8231
2	25.2828	28.8847	24.4029	25.8024	2	14.2592	18.917	21.7703	21.9884
3	22.599	26.1771	27.1268	25.9263	3	14.6145	18.55	19.7157	19.2587
4	23.9841	29.9224	25.6748	25.9359	4	14.177	18.9891	19.5129	20.1291
5	25.9997	22.7212	26.6668	27.823	5	14.5757	19.4723	19.3741	21.1194
6	25.4812	26.3847	27.2251	24.6978	6	14.0829	17.6471	19.7925	19.7659
7	25.9498	24.7776	31.2934	26.5186	7	13.5615	20.5816	18.3289	18.9755
8	23.0137	25.5775	26.4831	23.5281	8	13.1773	18.2309	19.1601	20.1526
9	26.0427	25.6475	27.2444	25.8079	9	13.91	19.2706	18.7105	18.4608
10	22.1914	26.8962	25.8115	27.1588	10	14.4025	17.9479	19.7761	17.5405
mean	24.5658	26.3187	26.7959	25.7634		14.1884	18.7828	19.5392	19.6214
standard deviation	1.49289	2.00719	1.80664	1.2787		0.553902	0.860939	0.915036	1.30259
p-value		0.0398237	0.00753587	0.0699695			3.24455e-11	5.27779e-12	4.19852e-10
Table S6-3-5 Raw data of nitrogen utilization efficiency in Arabidopsis thaliana.
CK					Low nitrate
Repeat	WT	OE-1	OE-2	OE-3	Repeat	WT	OE-1	OE-2	OE-3
1	0.0187931	0.0198975	0.0192569	0.0188679	1	0.0153616	0.0173339	0.0171744	0.0167796
2	0.0196029	0.0206867	0.0184503	0.020147	2	0.0167695	0.0173563	0.0181734	0.0173693
3	0.0182381	0.0194204	0.019591	0.0198842	3	0.015244	0.017638	0.017358	0.0174073
4	0.0178333	0.0203326	0.0185973	0.0180389	4	0.0177756	0.0157569	0.0172994	0.019282
5	0.0207216	0.0171921	0.0204794	0.0184256	5	0.0160717	0.0175149	0.0185197	0.017446
6	0.0200067	0.0186777	0.0189356	0.0187774	6	0.0152878	0.0177072	0.0169377	0.0179109
7	0.0177144	0.017474	0.0219082	0.0194401	7	0.0157389	0.0174331	0.0163245	0.016823
8	0.0185285	0.0183988	0.0196292	0.018402	8	0.0169067	0.0175101	0.0171959	0.0167503
9	0.0173401	0.0170356	0.0196136	0.0179698	9	0.0167019	0.0175169	0.0174255	0.0172308
10	0.0177154	0.018637	0.0175997	0.0171763	10	0.0166027	0.0165493	0.0163139	0.0163179
mean	0.0186494	0.0187752	0.0194061	0.0187129		0.016246	0.0172317	0.0172722	0.0173317
standard deviation	0.00112432	0.00129748	0.00118388	0.000914837		0.000841766	0.000608974	0.000694727	0.000823183
p-value		0.819346	0.159993	0.891335			0.0076864	0.00814439	0.00922126
Table S6-3-6 Raw data of nitrogen uptake efficiency in Arabidopsis thaliana.
CK					Low nitrate
Repeat	WT	OE-1	OE-2	OE-3	Repeat	WT	OE-1	OE-2	OE-3
1	176.859	164.77	184.612	178.359	1	118.154	119.876	125.006	123.836
2	181.89	181.665	156.429	188.339	2	98.3396	147.789	151.183	138.292
3	169.918	195.351	187.082	182.579	3	107.46	122.039	121.702	126.702
4	164.275	181.348	182.091	187.941	4	113.416	121.725	132.741	146.928
5	181.816	167.068	189.126	176.095	5	99.1541	120.199	122.621	149.783
6	174.29	166.992	180.299	165.757	6	111.769	102.599	127.694	127.522
7	182.745	182.189	188.515	177.977	7	103.523	140.97	115.276	110.323
8	158.715	180.123	175.384	155.815	8	84.4698	124.019	124.416	131.716
9	180.852	191.399	186.605	172.052	9	103.037	134.759	109.418	119.102
10	165.608	173.524	176.791	195.387	10	102.146	121.27	142.274	120.14
mean	173.697	178.443	180.693	178.03		104.147	125.525	127.233	129.434
standard deviation	8.62439	10.3338	9.76208	11.5959		9.44367	12.7032	12.2722	12.4926
p-value		0.279496	0.106624	0.355554			0.000459894	0.000172862	7.38056e-05
Table S6-3-7 Raw data of NR activity in Arabidopsis thaliana.
CK					Low nitrate
Repeat	WT	OE-1	OE-2	OE-3	Repeat	WT	OE-1	OE-2	OE-3
1	33.171	35.354	33.99	32.954	1	23.21	26.327	25.116	26.215
2	33.223	32.135	32.588	33.721	2	22.972	27.91	26.461	27.181
3	34.011	34.17	33.978	33.824	3	23.617	27.93	26.835	27.723
4	33.615	35.478	34.519	34.676	4	22.877	26.882	26.324	27.405
5	34.355	34.361	33.938	34.519	5	23.27	26.682	27.58	26.947
6	32.77	34.458	33.221	33.435	6	21.584	27.876	25.582	27.965
7	32.565	32.19	34.954	34.48	7	22.85	26.831	27.277	26.847
8	31.217	33.85	34.536	33.727	8	23.29	27.535	26.312	28.652
9	32.905	32.367	32.619	33.842	9	24.587	26.919	27.669	26.374
10	34.529	33.296	34.906	33.705	10	21.465	26.942	28.481	27.914
mean	33.2361	33.7659	33.9249	33.8883		22.9722	27.1834	26.7637	27.3223
standard deviation	0.97331	1.23729	0.865601	0.531313		0.912404	0.578956	1.01674	0.760905
p-value		0.301285	0.111765	0.0793189			3.28323e-10	6.39276e-08	8.95002e-10
Table S6-3-8 Raw data of GS activity in Arabidopsis thaliana.
CK					Low nitrate
Repeat	WT	OE-1	OE-2	OE-3	Repeat	WT	OE-1	OE-2	OE-3
1	25.554	26.595	26.947	27.317	1	17.759	21.933	20.472	20.588
2	24.195	26.921	25.712	26.875	2	17.305	20.854	20.797	19.36
3	26.366	26.296	26.64	25.777	3	17.64	20.304	21.565	21.43
4	25.588	25.248	27.765	26.945	4	17.141	21.882	22.492	19.654
5	26.434	26.698	25.358	25.673	5	18.509	21.354	21.591	21.369
6	25.957	25.31	26.732	25.547	6	17.615	19.371	22.856	20.421
7	26.76	26.193	25.207	26.153	7	18.533	18.611	21.169	21.15
8	24.32	26.312	26.519	25.779	8	16.635	19.657	20.641	20.41
9	25.05	25.322	27.257	25.828	9	17.827	21.615	20.92	21.77
10	26.401	25.229	25.858	26.602	10	18.774	20.143	19.218	21.199
mean	25.6625	26.0124	26.3995	26.2496		17.7738	20.5724	21.1721	20.7351
standard deviation	0.899079	0.667156	0.840303	0.632125		0.673346	1.14155	1.03829	0.790832
p-value		0.336102	0.0744348	0.108419			2.90075e-06	7.47608e-08	4.28989e-08
Table S6-3-9 Raw data of GOGAT activity in Arabidopsis thaliana.
CK					Low nitrate
Repeat	WT	OE-1	OE-2	OE-3	Repeat	WT	OE-1	OE-2	OE-3
1	23.277	23.906	24.958	23.28	1	17.567	18.945	18.546	19.53
2	24.799	24.865	23.178	24.363	2	15.901	18.255	20.924	19.755
3	24.805	23.259	24.13	25.477	3	16.611	19.336	19.15	18.44
4	23.905	23.316	25.304	24.885	4	16.168	18.979	18.21	19.762
5	24.864	24.257	24.831	23.279	5	16.906	19.422	19.109	18.628
6	23.226	23.44	25.709	24.224	6	16.749	19.72	18.949	20.567
7	22.709	24.28	24.451	23.914	7	15.845	18.994	18.175	20.29
8	24.787	24.292	25.856	24.811	8	16.952	19.91	19.445	19.417
9	23.523	24.437	24.593	23.931	9	16.608	20.12	18.136	18.756
10	22.293	23.487	23.55	23.862	10	16.664	18.29	19.596	18.828
mean	23.8188	23.9539	24.656	24.2026		16.5971	19.1971	19.024	19.3973
standard deviation	0.958172	0.552791	0.870564	0.704225		0.519003	0.629464	0.85268	0.721702
p-value		0.703869	0.0557581	0.320944			7.92451e-09	4.29613e-07	9.47986e-09
Table S6-3-10 Raw data of Amino acid content in Arabidopsis thaliana.
CK					Low nitrate
Repeat	WT	OE-1	OE-2	OE-3	Repeat	WT	OE-1	OE-2	OE-3
1	231.018	234.566	234.937	243.92	1	170.411	198.912	196.803	205.514
2	225.52	230.88	241.544	212.544	2	165.467	188.922	183.773	183.683
3	231.778	241.515	255.16	220.984	3	185.656	196.777	200.095	189.478
4	225.382	234.656	212.67	223.348	4	182.996	201.196	213.883	204.904
5	212.85	220.988	234.563	243.872	5	173.48	212.241	202.386	197.95
6	220.356	234.508	240.228	215.294	6	180.056	215.177	186.496	213.51
7	235.896	215.222	214.262	228.674	7	172.66	190.979	186.78	186.543
8	237.836	233.181	223.467	231.827	8	180.399	195.137	189.471	189.785
9	234.858	216.907	222.993	227.805	9	167.712	186.856	217.393	211.027
10	217.363	215.372	241.441	224.665	10	178.961	195.602	188.629	215.562
mean	227.286	227.78	232.126	227.293		175.78	198.18	196.571	199.796
standard deviation	8.42291	9.67265	13.5054	10.5295		6.78761	9.30898	11.8049	11.8646
p-value		0.904448	0.348916	0.998597			8.32693e-06	0.000134821	2.83309e-05

## Sheet: Table S6-4
Table S6-4 Raw data of GhNRT2.1e-silenced plants and control plants.
Table S6-4-1 Raw data of dry weight in silenced plants and control plants.
CK				Low nitrate
Repeat	WT	TRV2:00	TRV2:GhNRT2.1e	Repeat	WT	TRV2:00	TRV2:GhNRT2.1e
1	1.832	1.835	1.863	1	1.434	1.42	1.204
2	1.953	1.924	1.875	2	1.417	1.424	1.225
3	2.053	1.861	1.891	3	1.47	1.509	1.113
4	1.762	1.856	2.051	4	1.595	1.696	1.097
5	1.972	1.924	1.833	5	1.507	1.572	1.235
6	2.035	1.852	1.806	6	1.589	1.64	1.254
7	1.925	2.082	1.738	7	1.467	1.494	1.248
8	1.823	2.018	1.817	8	1.538	1.691	1.169
9	1.728	1.865	1.711	9	1.499	1.51	1.051
10	1.73	1.71	1.976	10	1.435	1.487	1.268
mean	1.8813	1.8927	1.8561		1.4951	1.5443	1.1864
standard deviation	0.1224	0.102728	0.101958		0.0629452	0.101444	0.075425
p-value of WT and TRV2:00		0.824055				0.20893
p-value of WT and TRV2:GhNRT2.1e			0.622967				9.84428e-09
p-value of TRV2:00 and TRV2:GhNRT2.1e			0.434336				4.75986e-08
Table S6-4-2 Raw data of total nitrogen content in silenced plants and control plants.
CK				Low nitrate
Repeat	WT	TRV2:00	TRV2:GhNRT2.1e	Repeat	WT	TRV2:00	TRV2:GhNRT2.1e
1	31.717	30.79	32.085	1	25.202	26.903	22.375
2	31.4063	33.856	32.481	2	27.097	27.406	24.78
3	32.987	31.84	31.893	3	26.126	27.595	22.043
4	31.62	32.484	31.127	4	26.721	27.183	23.77
5	31.308	29.06	30.826	5	27.15	27.176	22.158
6	30.42	30.28	31.66	6	27.825	25.848	23.452
7	30.875	31.722	30.782	7	26.93	26.104	22.235
8	31.559	30.49	30.395	8	25.566	28.706	23.913
9	30.283	32.569	29.55	9	25.196	26.714	22.308
10	31.166	30.11	30.637	10	27.38	26.432	22.573
mean	31.3341	31.3201	31.1436		26.5193	27.0067	22.9607
standard deviation	0.759848	1.42989	0.887672		0.939054	0.819014	0.945491
p-value of WT and TRV2:00		0.978442				0.231999
p-value of WT and TRV2:GhNRT2.1e			0.612383				1.12467e-07
p-value of TRV2:00 and TRV2:GhNRT2.1e			0.743997				6.30259e-09
Table S6-4-3 Raw data of nitrate content in silenced plants and control plants.
CK				Low nitrate
Repeat	WT	TRV2:00	TRV2:GhNRT2.1e	Repeat	WT	TRV2:00	TRV2:GhNRT2.1e
1	645.62	643.267	630.906	1	494.668	504.844	410.268
2	634.875	655.366	625.194	2	501.302	501.99	395.638
3	625.649	638.416	668.678	3	517.653	493.606	400.682
4	674.184	630.42	631.47	4	493.18	491.16	407.109
5	631.998	628.642	617.345	5	507.694	504.48	388.996
6	635.998	618.286	608.684	6	502.194	507.484	406.265
7	658.707	635.413	638.852	7	493.456	463.402	397.382
8	624.101	641.86	604.825	8	511.08	500.16	392.808
9	630.453	662.466	633.907	9	482.496	496.463	371.747
10	625.876	624.952	618.448	10	488.562	485.04	391.831
mean	638.746	637.909	627.831		499.228	494.863	396.273
standard deviation	16.296	13.5544	18.1058		10.7968	13.0571	11.1575
p-value of WT and TRV2:00		0.901974				0.425828
p-value of WT and TRV2:GhNRT2.1e			0.173564				4.24766e-14
p-value of TRV2:00 and TRV2:GhNRT2.1e			0.17586				5.09678e-13
Table S6-4-4 Raw data of total nitrogen accumulation in silenced plants and control plants.
CK				Low nitrate
Repeat	WT	TRV2:00	TRV2:GhNRT2.1e	Repeat	WT	TRV2:00	TRV2:GhNRT2.1e
1	58.1055	56.4996	59.7744	1	36.1397	38.2023	26.9395
2	61.3365	65.1389	60.9019	2	38.3964	39.0261	30.3555
3	67.7223	59.2542	60.3097	3	38.4052	41.6409	24.5339
4	55.7144	60.2903	63.8415	4	42.62	46.1024	26.0757
5	61.7394	55.9114	56.5041	5	40.915	42.7207	27.3651
6	61.9047	56.0786	57.178	6	44.2139	42.3907	29.4088
7	59.4344	66.0452	53.4991	7	39.5063	38.9994	27.7493
8	57.5321	61.5288	55.2277	8	39.3205	48.5418	27.9543
9	52.329	60.7412	50.5601	9	37.7688	40.3381	23.4457
10	53.9172	51.4881	60.5387	10	39.2903	39.3044	28.6226
mean	58.9736	59.2976	57.8335		39.6576	41.7267	27.245
standard deviation	4.4938	4.45154	3.99172		2.36856	3.36613	2.11535
p-value of WT and TRV2:00		0.873091				0.129322
p-value of WT and TRV2:GhNRT2.1e			0.556119				3.12986e-10
p-value of TRV2:00 and TRV2:GhNRT2.1e			0.448767				9.72267e-10
Table S6-4-5 Raw data of nitrogen utilization efficiency in silenced plants and control plants.
CK				Low nitrate
Repeat	WT	TRV2:00	TRV2:GhNRT2.1e	Repeat	WT	TRV2:00	TRV2:GhNRT2.1e
1	0.0577608	0.0595973	0.0580645	1	0.0569002	0.0527822	0.0538101
2	0.062185	0.0568289	0.0577261	2	0.0522936	0.0519594	0.049435
3	0.0622366	0.0584485	0.059292	3	0.0562658	0.0546838	0.0504922
4	0.0557242	0.0571358	0.0658913	4	0.0596909	0.0623919	0.0461506
5	0.0629871	0.0662078	0.0594628	5	0.0555064	0.0578452	0.0557361
6	0.0668968	0.0611625	0.0570436	6	0.0571069	0.0634478	0.0534709
7	0.0623482	0.0656327	0.0564616	7	0.0544746	0.0572326	0.0561277
8	0.0577648	0.0661856	0.0597796	8	0.060158	0.0589075	0.0488855
9	0.0570617	0.057263	0.0579019	9	0.0594936	0.0565247	0.0471131
10	0.0555092	0.0567918	0.0644972	10	0.0524105	0.0562576	0.0561733
mean	0.0600474	0.0605254	0.059612		0.0564301	0.0572033	0.0517395
standard deviation	0.00378373	0.00402395	0.00314194		0.00283952	0.00371155	0.003798
p-value of WT and TRV2:00		0.787481				0.607196
p-value of WT and TRV2:GhNRT2.1e			0.782706				0.00581296
p-value of TRV2:00 and TRV2:GhNRT2.1e			0.578556				0.00440998
Table S6-4-6 Raw data of nitrogen uptake efficiency in silenced plants and control plants.
CK				Low nitrate
Repeat	WT	TRV2:00	TRV2:GhNRT2.1e	Repeat	WT	TRV2:00	TRV2:GhNRT2.1e
1	166.97	162.823	190.972	1	114.366	122.443	82.8908
2	177.273	195.612	172.039	2	123.066	121.577	96.6736
3	199.771	180.653	180.029	3	114.301	132.193	80.176
4	162.433	183.253	200.13	4	137.042	142.732	80.4805
5	183.203	166.9	173.859	5	126.672	137.366	87.4285
6	181.008	158.414	172.223	6	139.476	135.002	89.3885
7	177.416	207.038	158.281	7	121.558	126.212	86.9883
8	170.718	193.487	161.958	8	126.433	154.592	83.9468
9	146.58	179.708	156.05	9	118.77	132.256	74.1953
10	160.468	162.423	189.777	10	123.167	123.599	95.0916
mean	172.584	179.031	175.532		124.485	132.797	85.726
standard deviation	14.6411	16.3299	14.7345		8.44635	10.3343	6.89563
p-value of WT and TRV2:00		0.364887				0.0644971
p-value of WT and TRV2:GhNRT2.1e			0.658953				1.4344e-09
p-value of TRV2:00 and TRV2:GhNRT2.1e			0.620977				5.17469e-10
Table S6-4-7 Raw data of relative chlorophyll content in silenced plants and control plants.
CK				Low nitrate
Repeat	WT	TRV2:00	TRV2:GhNRT2.1e	Repeat	WT	TRV2:00	TRV2:GhNRT2.1e
1	38.587	38.584	38.673	1	34.13	33.774	30.83
2	38.466	40.111	39.537	2	33.37	35.948	29.424
3	37.741	37.261	38.136	3	34.383	33.616	30.413
4	38.098	40.175	38.406	4	35.846	34.157	32.438
5	37.643	38.629	38.043	5	34.578	34.735	30.24
6	40.342	37.314	38.713	6	33.307	32.429	32.639
7	37.885	38.025	37.549	7	34.125	34.286	29.14
8	39.395	40.151	37.44	8	35.916	33.916	30.613
9	40.886	37.581	38.693	9	33.236	32.86	29.557
10	38.341	38.46	37.991	10	34.588	33.745	30.197
mean	38.7384	38.6291	38.3181		34.3479	33.9466	30.5491
standard deviation	1.1157	1.15457	0.623102		0.953841	0.969027	1.17815
p-value of WT and TRV2:00		0.831973				0.363017
p-value of WT and TRV2:GhNRT2.1e			0.312078				2.80306e-07
p-value of TRV2:00 and TRV2:GhNRT2.1e			0.463177				1.43101e-06
Table S6-4-8 Raw data of NR activity in silenced plants and control plants.
CK				Low nitrate
Repeat	WT	TRV2:00	TRV2:GhNRT2.1e	Repeat	WT	TRV2:00	TRV2:GhNRT2.1e
1	27.944	27.77	26.828	1	21.642	20.829	17.942
2	26.602	26.449	27.629	2	21.988	20.696	16.509
3	26.748	26.388	26.441	3	20.175	21.709	17.154
4	25.214	27.286	25.399	4	20.722	20.71	18.783
5	27.158	26.816	25.425	5	19.519	19.652	17.818
6	27.002	25.579	26.38	6	21.22	21.286	16.79
7	27.403	26.849	25.118	7	20.961	23.335	15.216
8	26..977	24.772	23.978	8	22.704	21.435	16.451
9	27.749	28.796	25.232	9	20.862	21.987	16.467
10	25.77	26.931	25.511	10	20.009	20.106	18.106
mean	26.8433	26.7636	25.7941		20.9802	21.1745	17.1236
standard deviation	0.890451	1.10877	1.03502		0.959764	1.03911	1.04791
p-value of WT and TRV2:00		0.865863				0.669181
p-value of WT and TRV2:GhNRT2.1e			0.0307988				8.88247e-08
p-value of TRV2:00 and TRV2:GhNRT2.1e			0.0583788				7.52037e-08
Table S6-4-9 Raw data of GS activity in silenced plants and control plants.
CK				Low nitrate
Repeat	WT	TRV2:00	TRV2:GhNRT2.1e	Repeat	WT	TRV2:00	TRV2:GhNRT2.1e
1	23.14	23.533	23.243	1	17.505	18.828	15.857
2	25.056	22.562	23.602	2	18.414	17.772	15.336
3	23.715	25.986	22.497	3	17.914	18.122	14.199
4	23.135	24.098	22.113	4	18.152	19.495	16.518
5	22.481	23.875	22.644	5	20.803	18.421	14.729
6	24.353	22.035	24.846	6	18.733	18.645	15.862
7	23.195	23.568	23.46	7	17.521	19.122	14.548
8	23.505	22.828	22.857	8	18.884	19.199	15.152
9	25.122	24.198	23.199	9	19.95	20.457	14.296
10	24.155	24.45	22.46	10	18.371	18.599	15.428
mean	23.7857	23.7133	23.0921		18.6247	18.866	15.1925
standard deviation	0.871325	1.11038	0.779894		1.04826	0.758164	0.756116
p-value of WT and TRV2:00		0.872948				0.562638
p-value of WT and TRV2:GhNRT2.1e			0.0770171				1.22045e-07
p-value of TRV2:00 and TRV2:GhNRT2.1e			0.164891				2.51271e-09
Table S6-4-10 Raw data of GOGAT activity in silenced plants and control plants.
CK				Low nitrate
Repeat	WT	TRV2:00	TRV2:GhNRT2.1e	Repeat	WT	TRV2:00	TRV2:GhNRT2.1e
1	17.532	18.66	17.477	1	14.467	15.987	11.416
2	17.26	16.551	16.427	2	15.854	14.19	12.26
3	18.19	16.537	18.933	3	15.428	13.532	10.66
4	17.693	17.579	17.572	4	14.477	14.589	12.504
5	18.349	16.727	18.515	5	14.679	13.876	11.65
6	17.399	17.783	18.904	6	14.602	13.379	12.49
7	16.658	16.27	17.536	7	13.569	14.701	11.4
8	18.991	18.193	18.447	8	14.982	13.552	10.675
9	16.818	17.809	16.512	9	13.247	14.923	11.428
10	17.329	18.589	17.53	10	14.532	14.66	11.747
mean	17.6219	17.4698	17.7853		14.5837	14.3389	11.623
standard deviation	0.713426	0.889623	0.89896		0.770182	0.801549	0.65882
p-value of WT and TRV2:00		0.678177				0.495071
p-value of WT and TRV2:GhNRT2.1e			0.657915				2.98272e-08
p-value of TRV2:00 and TRV2:GhNRT2.1e			0.440462				1.50275e-07
Table S6-4-11 Raw data of Amino acid content in silenced plants and control plants.
CK				Low nitrate
Repeat	WT	TRV2:00	TRV2:GhNRT2.1e	Repeat	WT	TRV2:00	TRV2:GhNRT2.1e
1	287.869	267.808	273.197	1	235.15	228.625	200.385
2	276.214	280.46	275.897	2	228.91	215.341	205.796
3	283.237	287.624	279.54	3	230.172	243.287	191.702
4	290.46	278.897	295.237	4	236.56	222.425	190.309
5	274.624	291.54	282.46	5	225.873	217.58	201.326
6	287.897	294.237	286.624	6	222.228	212.438	190.495
7	284.54	293.535	275.164	7	228.548	235.54	184.911
8	267.356	284.231	268.689	8	245.392	221.84	196.914
9	280.589	276.53	284.467	9	214.535	226.475	204.356
10	278.987	288.677	273.978	10	227.231	242.689	195.657
mean	281.177	284.354	279.525		229.46	226.624	196.185
standard deviation	7.1134	8.452	7.82242		8.37422	10.9042	6.816
p-value of WT and TRV2:00		0.375196				0.522472
p-value of WT and TRV2:GhNRT2.1e			0.627217				1.32652e-08
p-value of TRV2:00 and TRV2:GhNRT2.1e			0.201459				6.23401e-07
Table S6-4-12 Raw data of CAT activity in silenced plants and control plants.
CK				Low nitrate
Repeat	WT	TRV2:00	TRV2:GhNRT2.1e	Repeat	WT	TRV2:00	TRV2:GhNRT2.1e
1	81.852	83.72	82.515	1	113.32	98.429	95.391
2	79.13	83.405	85.204	2	104.794	103.39	97.473
3	79.654	82.439	79.453	3	105.47	103.445	95.289
4	79.147	83.344	79.489	4	97.943	97.913	87.407
5	82.559	80.418	84.708	5	102.753	102.742	86.41
6	78.256	84.501	82.667	6	98.478	109.406	90.556
7	80.457	79.451	84.798	7	106.998	105.56	87.14
8	80.622	85.508	80.457	8	97.721	111.67	92.98
9	80.28	82.539	79.224	9	98.458	97.128	87.238
10	83.547	79.344	84.489	10	113.455	99.528	88.064
mean	80.5504	82.4669	82.3004		103.939	102.921	90.7948
standard deviation	1.66166	2.09914	2.45651		6.02657	4.90375	4.14893
p-value of WT and TRV2:00		0.0361824				0.683555
p-value of WT and TRV2:GhNRT2.1e			0.078426				2.18019e-05
p-value of TRV2:00 and TRV2:GhNRT2.1e			0.872375				1.19891e-05
Table S6-4-13 Raw data of POD activity in silenced plants and control plants.
CK				Low nitrate
Repeat	WT	TRV2:00	TRV2:GhNRT2.1e	Repeat	WT	TRV2:00	TRV2:GhNRT2.1e
1	1730.99	1775.58	1643.43	1	2230.23	2235.44	2033.49
2	1692.42	1631.4	1751.09	2	2134.44	2402.35	2021.3
3	1629.52	1765.21	1730.92	3	2167.18	2265.45	1951.42
4	1780.48	1678.59	1979.54	4	2260.46	2266.72	2024.62
5	1831.08	1723.92	1690.46	5	2232.87	2113.98	1941.77
6	1671.48	1731.1	1870.46	6	2320.73	2215.52	1932.93
7	1693.46	1897.45	1749.52	7	2321.16	2269.22	1866.12
8	1680.23	1643.26	1754.26	8	2214.56	2220.46	1903.87
9	1643.53	1679.47	1656.25	9	2344.52	2045.19	2056.56
10	1630.24	1685.54	1630.71	10	2313.19	2249.45	1884.54
mean	1698.34	1721.15	1745.66		2253.93	2228.38	1961.66
standard deviation	65.7604	78.1966	108.175		70.7906	95.5366	67.8467
p-value of WT and TRV2:00		0.489275				0.50537
p-value of WT and TRV2:GhNRT2.1e			0.252569				2.20091e-08
p-value of TRV2:00 and TRV2:GhNRT2.1e			0.568622				1.06651e-06
Table S6-4-14 Raw data of SOD activity in silenced plants and control plants.
CK				Low nitrate
Repeat	WT	TRV2:00	TRV2:GhNRT2.1e	Repeat	WT	TRV2:00	TRV2:GhNRT2.1e
1	1457.46	1354.98	1453.67	1	1983.56	1911.72	1654.61
2	1235.62	1541.87	1231.25	2	1794.86	1794.2	1683.56
3	1375.51	1532.63	1395.99	3	1837.42	1955.46	1682.65
4	1450.56	1254.7	1384.56	4	1796.52	1928.44	1578.52
5	1357.71	1315.72	1387.52	5	1815.21	1830.31	1653.48
6	1405.56	1453.7	1277.41	6	1778.63	1813.54	1875.64
7	1424.72	1320.48	1415.64	7	1787.13	1885.95	1653.51
8	1431.31	1355.63	1345.56	8	1818.31	1795.58	1657.67
9	1385.31	1230.48	1453.63	9	1846.54	1833.67	1656.55
10	1372.54	1364.56	1287.36	10	1927.43	1827.11	1606.89
mean	1389.63	1372.47	1363.26		1838.56	1857.6	1670.31
standard deviation	63.9299	106.223	76.062		66.5475	58.1004	78.9497
p-value of WT and TRV2:00		0.666887				0.504263
p-value of WT and TRV2:GhNRT2.1e			0.412313				6.67628e-05
p-value of TRV2:00 and TRV2:GhNRT2.1e			0.826007				1.03418e-05
Table S6-4-15 Raw data of MDA content in silenced plants and control plants.
CK				Low nitrate
Repeat	WT	TRV2:00	TRV2:GhNRT2.1e	Repeat	WT	TRV2:00	TRV2:GhNRT2.1e
1	119.485	124.462	116.283	1	145.432	153.56	182.977
2	116.542	115.524	124.414	2	130.458	128.887	183.425
3	113.253	113.634	124.554	3	136.416	157.31	194.56
4	121.154	126.233	127.545	4	140.172	138.287	187.02
5	108.502	116.213	131.64	5	158.535	154.464	193.956
6	119.125	118.146	125.576	6	142.431	136.489	190.399
7	126.31	105.449	116.002	7	137.583	145.404	178.658
8	121.197	125.57	138.212	8	136.527	132.479	187.858
9	122.215	129.417	125.255	9	135.604	142.545	197.752
10	107.551	115.452	113.595	10	123.459	135.279	187.755
mean	117.533	119.01	124.308		138.662	142.47	188.436
standard deviation	6.07671	7.29854	7.51512		9.28445	9.91622	5.88726
p-value of WT and TRV2:00		0.628897				0.386973
p-value of WT and TRV2:GhNRT2.1e			0.0397735				2.80294e-11
p-value of TRV2:00 and TRV2:GhNRT2.1e			0.127196				2.27879e-10
